# Supplementary material for: Intermittent dietary methionine deprivation facilitates tumoral ferroptosis and synergizes with checkpoint blockade
Source: PubMed Central journal article supplement (PMC10409767; doi:10.1038/s41467-023-40518-0), 2023-08-08
Supplement: 41467_2023_40518_MOESM1_ESM.pdf [file 41467_2023_40518_MOESM1_ESM.pdf]

## SUPPLEMENTARY INFORMATION

### **Intermittent dietary methionine deprivation facilitates tumoral ferroptosis and synergizes with checkpoint blockade**

Ying Xue<sup>1,#</sup>, Fujia Lu<sup>1,#</sup>, Zhenzhen Chang<sup>1</sup>, Jing Li<sup>1</sup>, Yuan Gao<sup>2</sup>, Jie Zhou<sup>1</sup>, Ying Luo<sup>3</sup>, Yongfeng Lai<sup>1</sup>, Siyuan Cao<sup>1</sup>, Xiaoxiao Li<sup>1</sup>, Yuhan Zhou<sup>1</sup>, Yan Li<sup>1</sup>, Zheng Tan<sup>1</sup>, Xiang Cheng<sup>4</sup>, Xiong Li<sup>5</sup>, Jing Chen<sup>6</sup>, Weimin Wang<sup>1,7,8,\*</sup>

<sup>1</sup>Department of Immunology, School of Basic Medicine, Tongji Medical College, Huazhong University of Science and Technology, Wuhan, China.

<sup>2</sup>Department of Oncology, Tongji Hospital, Tongji Medical College, Huazhong University of Science and Technology, Wuhan, China.

<sup>3</sup>Department of Laboratory Medicine, Tongji Hospital, Tongji Medical College, Huazhong University of Science and Technology, Wuhan, China.

<sup>4</sup>Department of Cardiology, Union Hospital, Tongji Medical College, Huazhong University of Science and Technology, Wuhan, China.

<sup>5</sup>Department of Gynecology & Obstetrics, the Central Hospital of Wuhan, Tongji Medical College, Huazhong University of Science and Technology, Wuhan, China.

<sup>6</sup>Cancer Center, Union Hospital, Tongji Medical College, Huazhong University of Science and Technology, Wuhan, China.

<sup>7</sup>Cell Architecture Research Institute, Huazhong University of Science and Technology, Wuhan, China.

<sup>8</sup>Key Laboratory of Organ Transplantation, Ministry of Education; NHC Key Laboratory of Organ Transplantation; Key Laboratory of Organ Transplantation, Chinese Academy of Medical Sciences, Wuhan, China.

# These authors contributed equally.

\* Correspondence: Weimin Wang, email: [weiminw@hust.edu.cn](mailto:weiminw@hust.edu.cn)

# Supplementary Figures

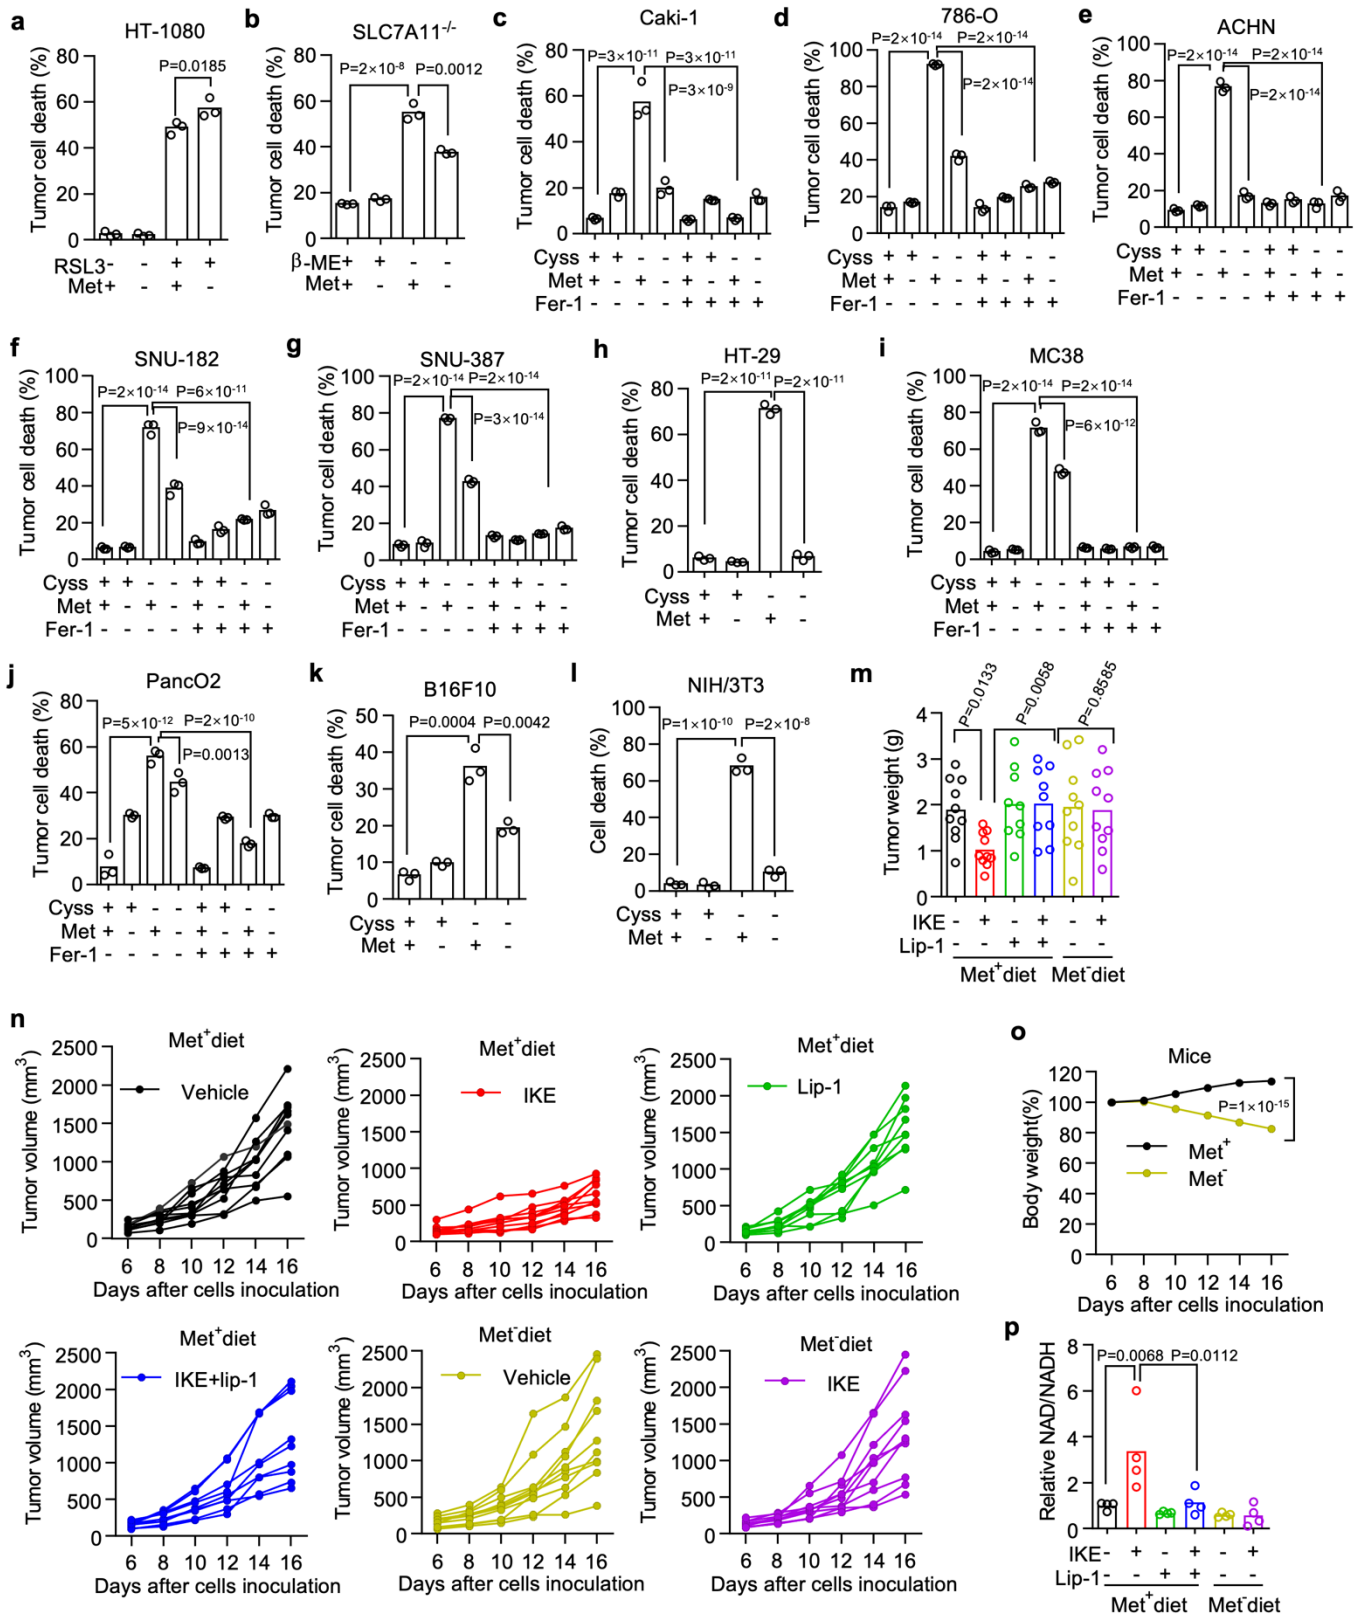

**Supplementary Figure 1. Prolonged methionine deprivation blocks ferroptosis induced by cystine deprivation or system xc- inhibition, but not by GPX4 inhibition.**

**a**, Cell death of HT-1080 cells cultured in methionine-free medium and treated with RSL3 (0.5  $\mu$ M) for 16 h. n = 3 biological replicates (one-way ANOVA).

**b**, Cell death of SLC7A11 deficient (SLC7A11<sup>-/-</sup>) HT-1080 cells treated with  $\beta$ -ME (50  $\mu$ M) withdrawal plus methionine co-withdrawal for 24 h.

**c- l**, Effect of methionine co-deprivation on cystine deprivation-induced ferroptosis in various human and mouse tumor cell lines. Cell death was detected at different time points: Caki-1 (**c**, 38h), 786-O (**d**, 26h), ACHN (**e**, 32h), SNU-182 (**f**, 37h), SNU387 (**g**, 38h), HT-29 (**h**, 48h), MC38 (**i**, 22h), PancO2 (**j**, 26h), B16F10 (**k**, 22h) and NIH/3T3 (**l**, 18h). Fer-1 (10  $\mu$ M) was added to confirm the cell death is ferroptosis. n = 3 biological replicates (one-way ANOVA).

**m- p**, Hepa1-6 tumor-bearing mice were fed with control (Met<sup>+</sup>) or methionine free (Met<sup>-</sup>) diet and treated with IKE (40 mg/kg), liproxstatin-1 (Lip-1, 10mg/kg) or their combination (n = 9 or 10 mice per group). Subcutaneous tumors were surgically removed and their weights were measured at the end point (**m**). Individual tumor growth was monitored over time (**n**). Mice body weights were monitored once switch to Met<sup>-</sup> diet (**o**). NAD/NADH ratio in isolated tumor tissues was quantified (**p**). Data were presented as mean  $\pm$  s.e.m. and P value is determined by one-way ANOVA (**m, p**) or two-way ANOVA (**o**).

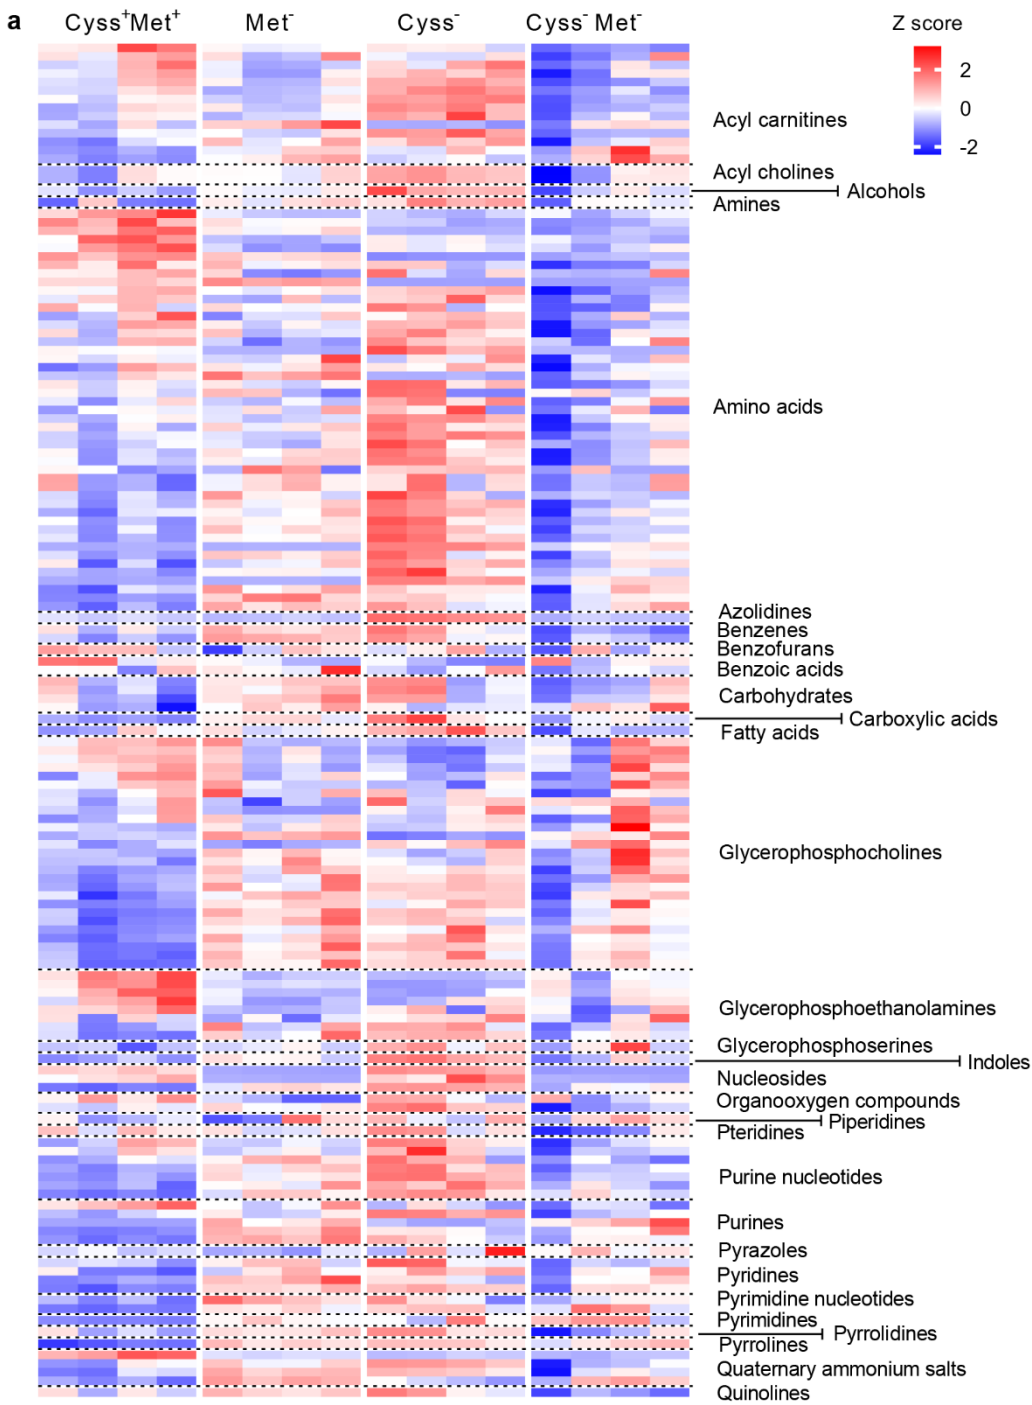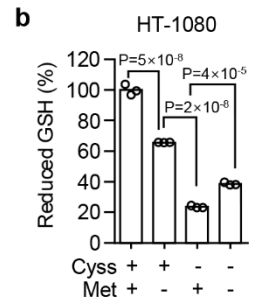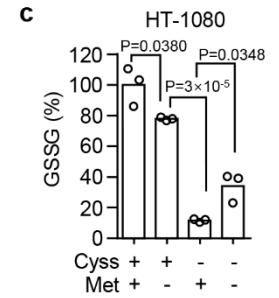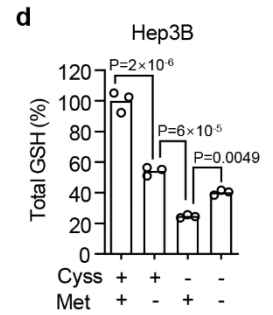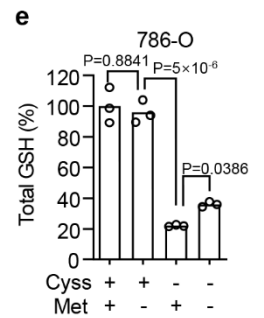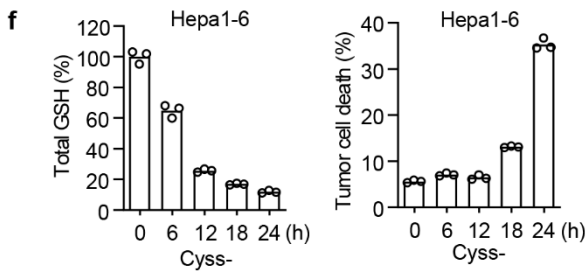

**Supplementary Figure 2. Prolonged methionine deprivation impairs substantial GSH depletion induced by cystine deprivation.**

**a**, Heatmap of metabolites belonging to different classes that are identified by LC-MS in HT-1080 cells. Cells were treated by cystine or methionine deprivation or their co-deprivation. n = 4 biological replicates.

**b, c**, Reduced GSH (**b**) and oxidized GSSG (**c**) content in HT-1080 cells cultured in cystine or methionine free or their double free medium for 6 h.

**d, e**, Total GSH content in Hep3B (**d**) or 786-O (**e**) cells cultured in cystine or methionine free or their double free medium for 8 h.

**f**, Total GSH content and time points matched cell death of Hepa1-6 cells upon cystine deprivation.

n = 3 biological replicates and P values are determined using one-way ANOVA (**b-e**).

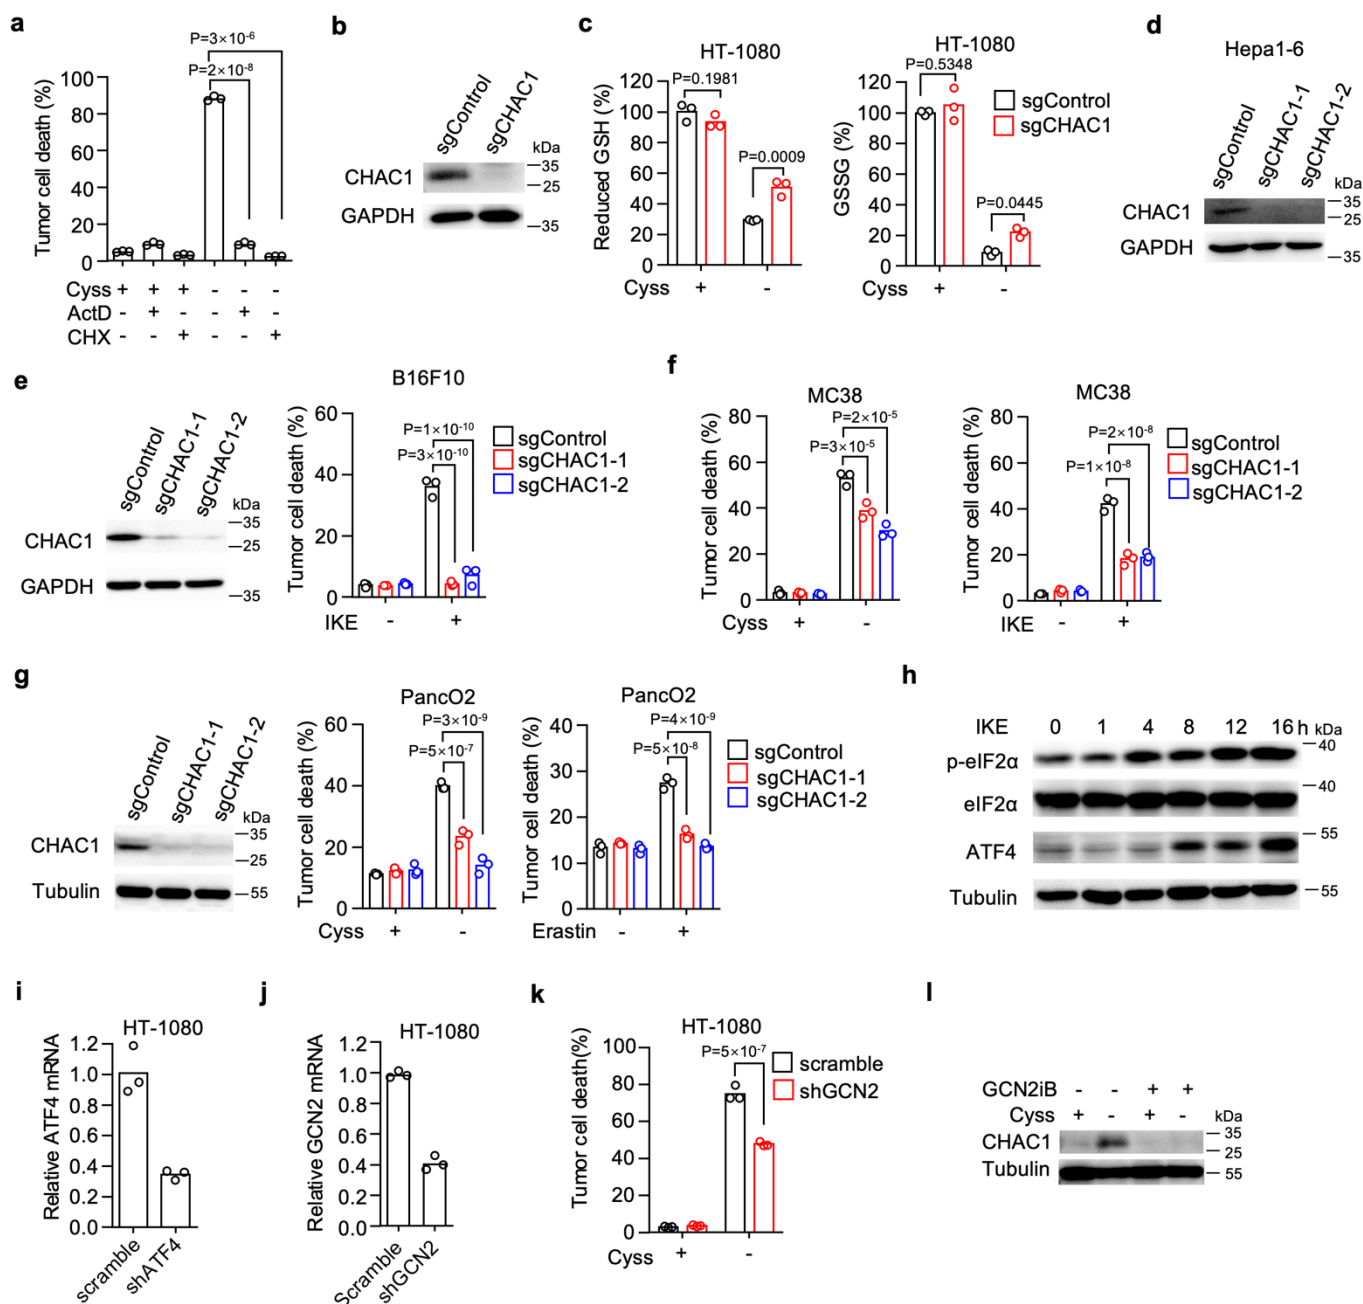

### Supplementary Figure 3. CHAC1 induction by cystine deprivation is mediated through GCN2-ATF4 pathway.

**a**, Cell death of HT-1080 cells treated with cystine deprivation in the presence of Actinomycin D (ActD, 5  $\mu$ M) or CHX (1 $\mu$ M) for 18 h.

**b, c**, Immunoblot of human CHAC1 in HT-1080 cells expressing sgControl or sgCHAC1 (**b**). Reduced GSH or oxidized GSSG contents in these cells under cystine deprivation for 8 h were measured (**c**).

**d**, Immunoblot of murine CHAC1 in Hepa1-6 cells expressing sgControl or two different sgCHAC1.

**e**, CHAC1 immunoblot in B16F10 cells expressing sgControl or two sgCHAC1. Cell deaths of these

cells treated with IKE (1  $\mu$ M) for 28 h were quantified.

**f**, Cell deaths of MC38 cells expressing sgControl or two different sgCHAC1 in response to cystine deprivation for 28 h or IKE (2  $\mu$ M) treatment for 30 h.

**g**, Immunoblot of murine CHAC1 in PancO2 cells expressing sgControl or sgCHAC1. Cell deaths of these cells under cystine deprivation for 29 h or erastin (10  $\mu$ M) treatment for 29 h.

**h**, Immunoblots of phosphorylated eIF2 $\alpha$  (p-eIF2 $\alpha$ ), total eIF2 $\alpha$  and ATF4 in HT-1080 cells treated by 0.5  $\mu$ M IKE for indicated time points. Tubulin serves as loading control.

**i**, Relative ATF4 mRNA level in scramble or ATF4 shRNA (shATF4) expressing HT-1080 cells.

**j**, Relative GCN2 mRNA level in scramble or GCN2 shRNA (shGCN2) expressing HT-1080 cells.

**k**, Cell death of scramble or shGCN2 expressing HT-1080 in response to cystine deprivation for 15 h.

**l**, Immunoblot of CHAC1 in HT-1080 cells treated by cystine deprivation plus GCN2 inhibitor (GCN2iB, 1  $\mu$ M) for 8 h.

The experiment was repeated twice with similar results (**d**, **h** and **l**). n = 3 biological replicates and P values are determined by one-way ANOVA (**a**) or two-way ANOVA (**c**, **e**, **f**, **g** and **k**).

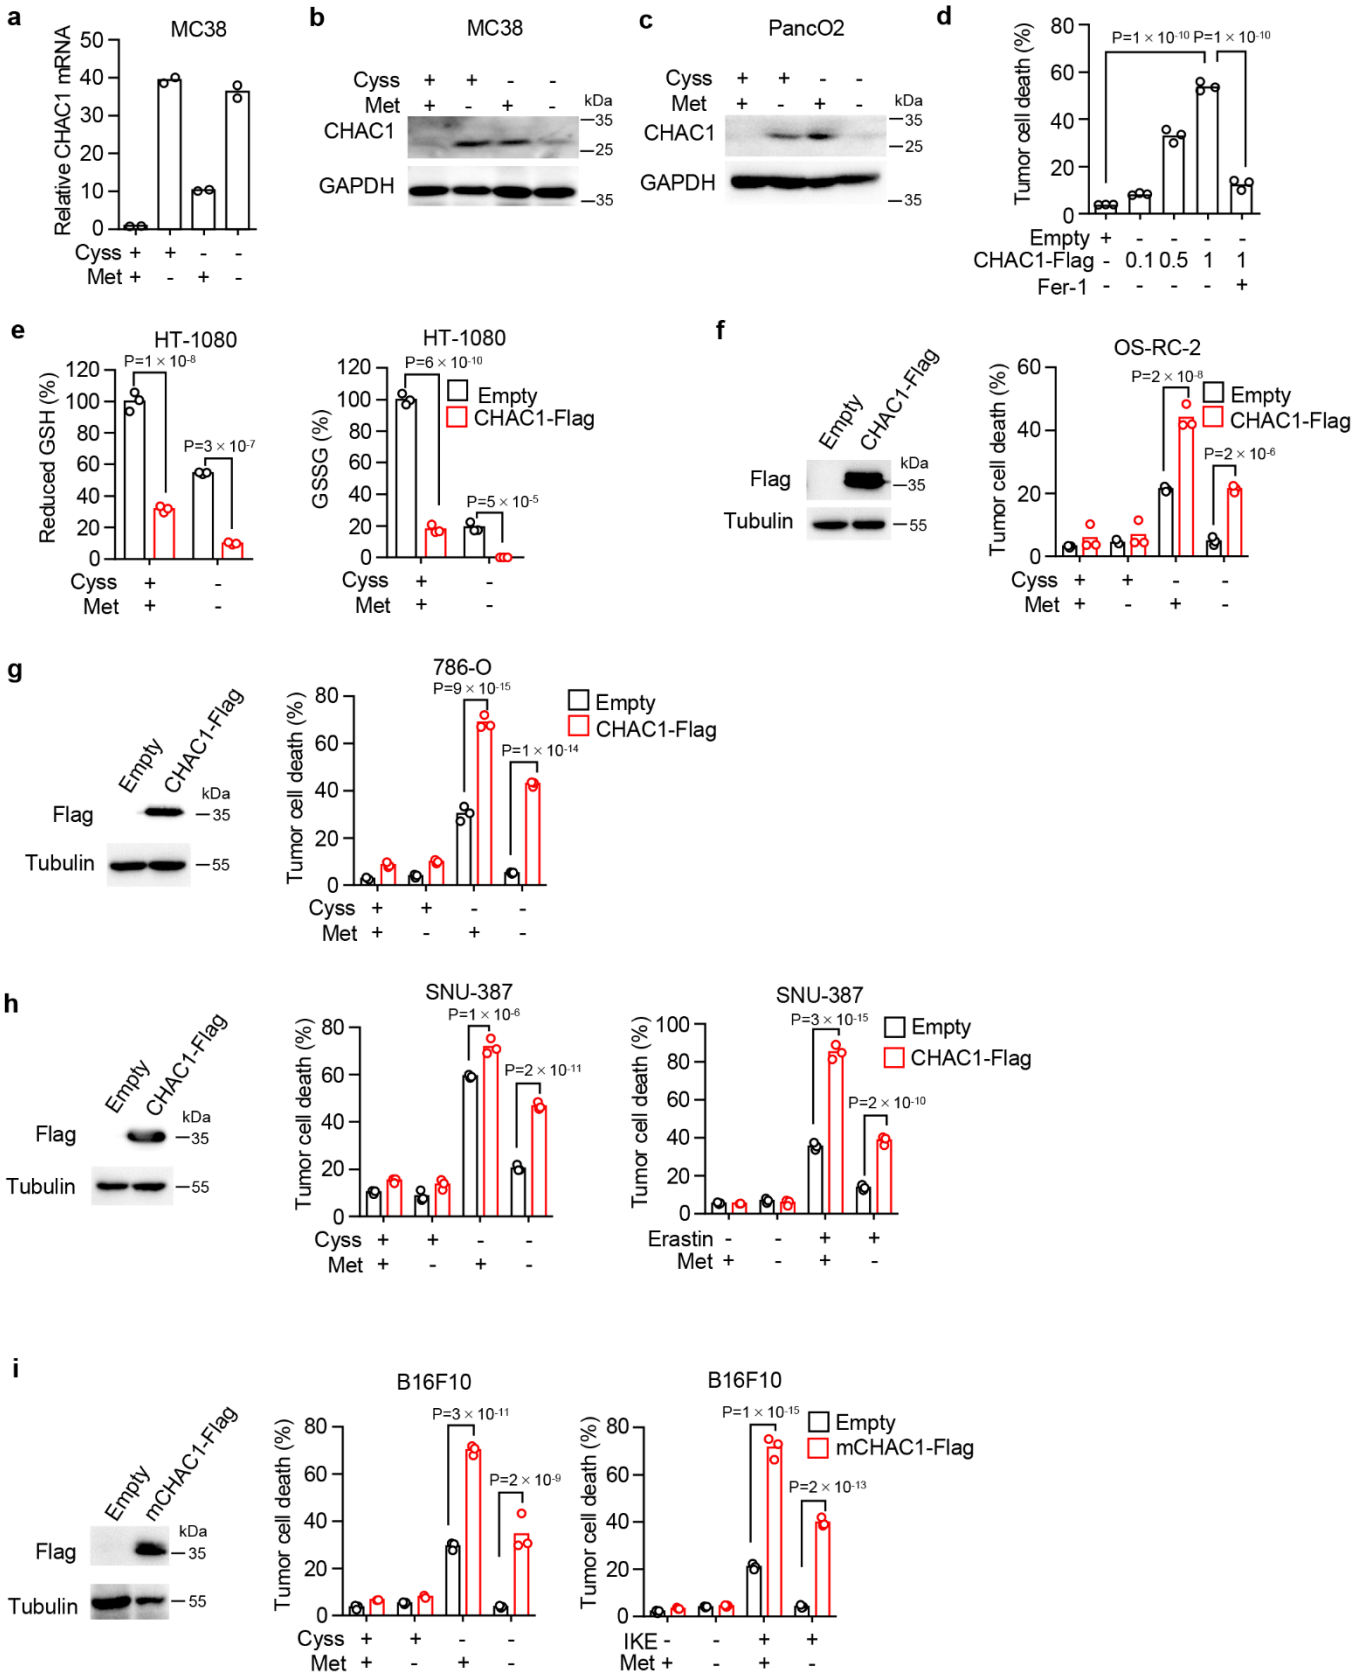



**Supplementary Figure 4. Prolonged methionine deficiency inhibits ferroptosis by interrupting CHAC1 synthesis induced by cystine deprivation.**

**a, b**, Relative mRNA (**a**) and protein (**b**) of mouse CHAC1 in MC38 cells treated with cystine withdrawal plus methionine co-withdrawal for 10 h.

**c**, Immunoblot of CHAC1 in PancO2 cells treated with cystine withdrawal plus methionine co-withdrawal for 10 h.

**d**, Cell death of HT-1080 cells after 20 hours of transient transfection with 1 µg empty plasmid or 0.1, 0.5 or 1 µg CHAC1-Flag expressing plasmid in the presence of Fer-1 (10 µM).

**e**, Reduced GSH and oxidized GSSG in CHAC1-Flag expressing HT-1080 cells treated with cystine withdrawal plus methionine co-withdrawal for 6 h.

**f, g**, OS-RC-2 (**f**) or 786-O (**g**) cells transduced with control (empty) or CHAC1-Flag expressing lentivirus. Immunoblot of Flag-tagged CHAC1 in these cells. Cells were treated with cystine withdrawal plus methionine co-withdrawal for 12 h (**f**) or 16 h (**g**), and the percentages of dead cells was measured.

**h**, Immunoblot of Flag-tagged CHAC1 in SNU-387 cells transduced with control (empty) or CHAC1-Flag expressing lentivirus. Cells were treated with cystine withdrawal or 10 µM erastin plus methionine co-withdrawal for 15 h or 17 h, and the percentages of dead cells was measured.

**i**, Immunoblot of Flag-tagged mouse CHAC1 in B16F10 cells transduced with control (empty) or mCHAC1-Flag expressing lentivirus. Cell death of these cells treated with cystine withdrawal or 0.5 µM IKE plus methionine co-withdrawal for 18 h.

The experiment was repeated twice with similar results (**c**).  $n = 3$  biological replicates and  $P$  values are determined by one-way ANOVA (**d**) or two-way ANOVA (**e- i**).

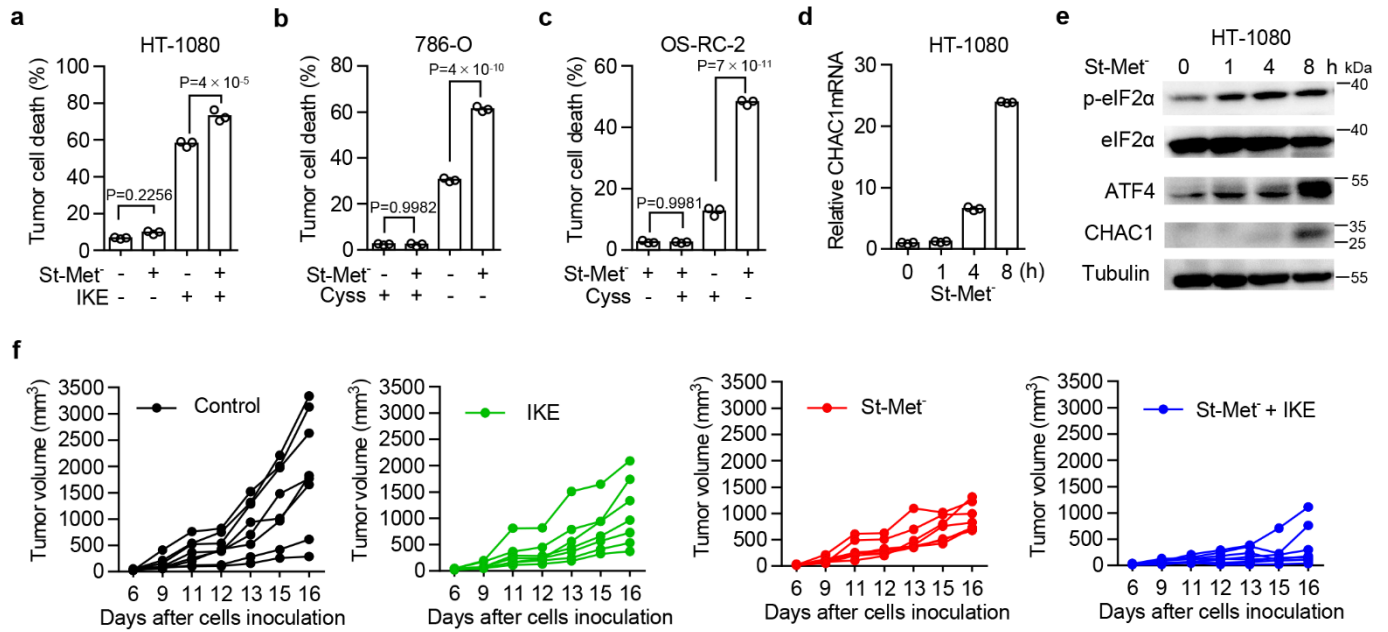

### Supplementary Figure 5. Short-term methionine starvation promotes cystine deprivation-induced ferroptosis

**a - c**, Cell death of HT-1080 (**a**), 786-O (**b**) and OS-RC-2 (**c**) cells pre-treated by St-Met<sup>-</sup> for 4 h (**a**) or 2 h (**b**, **c**), and followed by IKE treatment (0.3  $\mu$ M) for another 28 h (**a**) or by cystine deprivation for another 20 h (**b**) or 24 h (**c**).  $n = 3$  biological replicates and P values are determined by one-way ANOVA.

**d**, Relative mRNA level of CHAC1 in HT-1080 cells treated by St-Met<sup>-</sup> for 1- 8 h.

**e**, Immunoblots of phosphorylated eIF2 $\alpha$  (p-eIF2 $\alpha$ ), total eIF2 $\alpha$ , ATF4 and CHAC1 in HT-1080 cells treated by St-Met<sup>-</sup> for 1- 8 h. The experiment was repeated twice with similar results.

**f**, B16F10 tumour growth in individual mice that were treated by control vehicle, IKE, dietary methionine intermittent starvation or their combination shown in Fig. 5i.

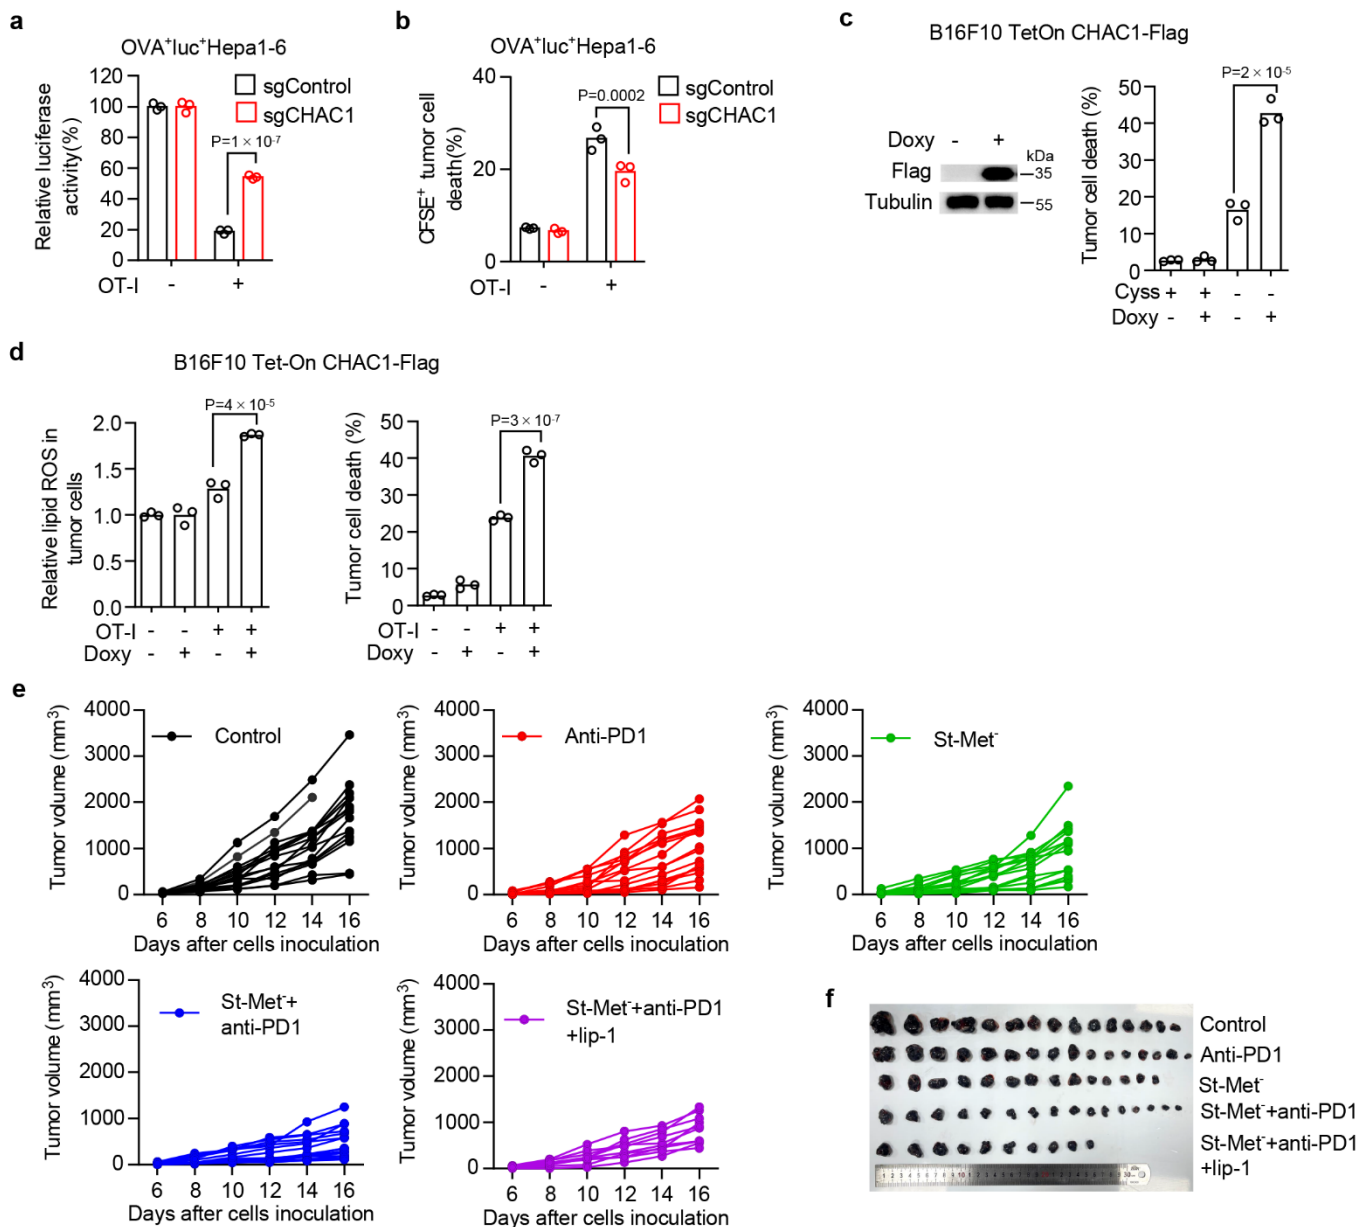

### Supplementary Figure 6. Short-term methionine starvation sensitizes tumor against CTL-mediated killing and PD-1 blockade therapy

**a, b**, Control (sgControl) or CHAC1 deficient (sgCHAC1) OVA<sup>+</sup>Luc<sup>+</sup> Hepa1-6 cells were co-cultured with OT-I cells (tumor: T= 1: 4) for 2 days. Luciferase activity (**a**) or the percentage of CFSE<sup>+</sup> 7-AAD<sup>+</sup> tumor cells (**b**) in the co-culture system was quantified.

**c**, Immunoblot of Flag-tagged CHAC1 in B16F10 cells transfected with a Tet-On-inducible CHAC1-Flag expressing plasmid. Cells were treated with or without Doxy (0.5 μg/mL) for 48 h.

**d**, Tet-On-inducible CHAC1-Flag expressing B16F10 cells were pretreated with or without Doxy for 36 hours, pulsed with OVA<sub>257-264</sub> peptide and then co-cultured with OT-I cells (tumor: T= 1: 8). Lipid ROS level (left) or cell death (right) in tumor cells was quantified.

**e, f**, Individual tumor growth in mice treated by control vehicle, anti-PD-1 antibody, St-Met<sup>-</sup>, the combination of St-Met<sup>-</sup> plus anti-PD-1 antibody or St-Met<sup>-</sup> + anti-PD1+ liproxstatin-1 shown in Figure

6e. Subcutaneous tumors were surgically removed and presented (**f**).

n = 3 biological replicates and P values are determined by one-way ANOVA (**c, d**) or two-way ANOVA (**a, b**).

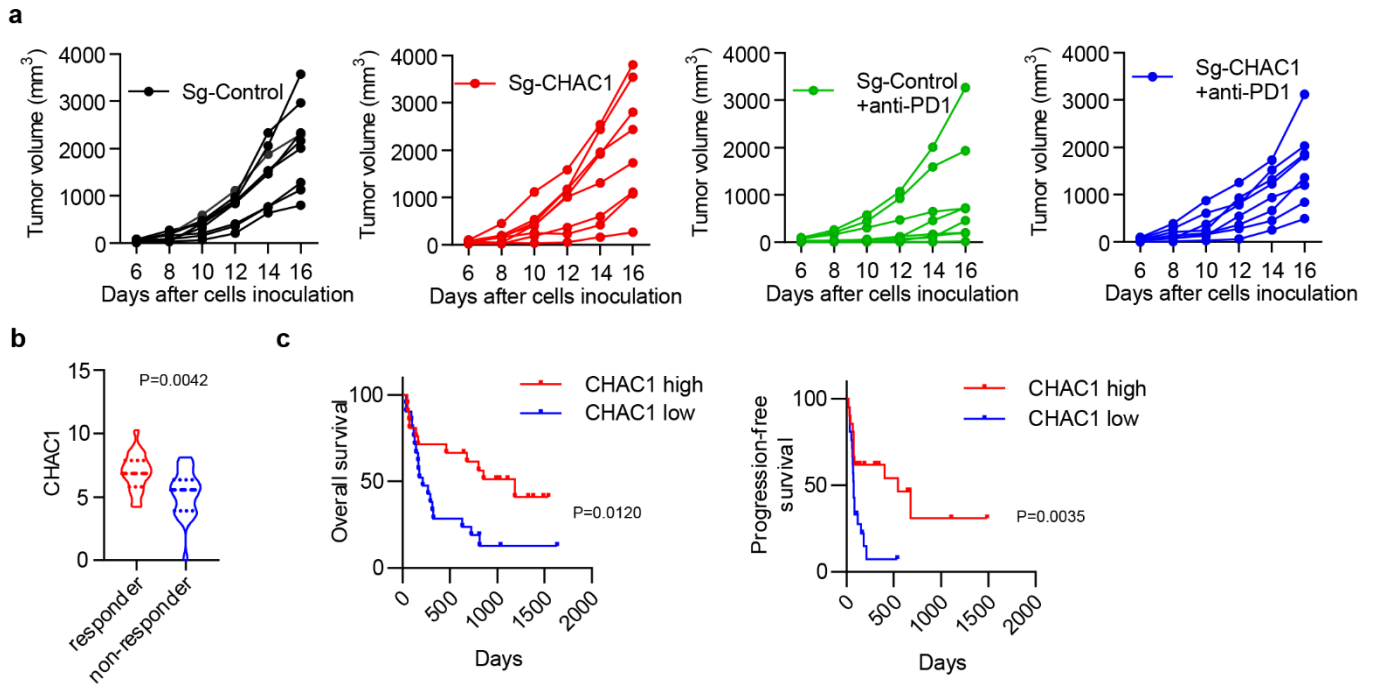

**Supplementary Figure 7. Tumor CHAC1 contributes to the responsiveness of checkpoint blockade.**

**a**, CHAC1 wildtype (sg-Control) or deficient (sg-CHAC1) B16F10 tumors bearing mice were treated by anti-PD-1 antibody shown in Fig. 7a. Individual tumor growth was monitored over time.

**b, c**, Violin plot comparing tumoral CHAC1 expression between responders and non-responders of melanoma patients who received anti-CTLA-4 therapy (**b**). Kaplan-Meier plots of overall survival (**c, left**) and progression-free survival (**c, right**) for these patients whose tumors demonstrate high vs low expression of CHAC1. P values are determined by two-sided Mann-Whitney test (**b**) or log-rank test (**c**).

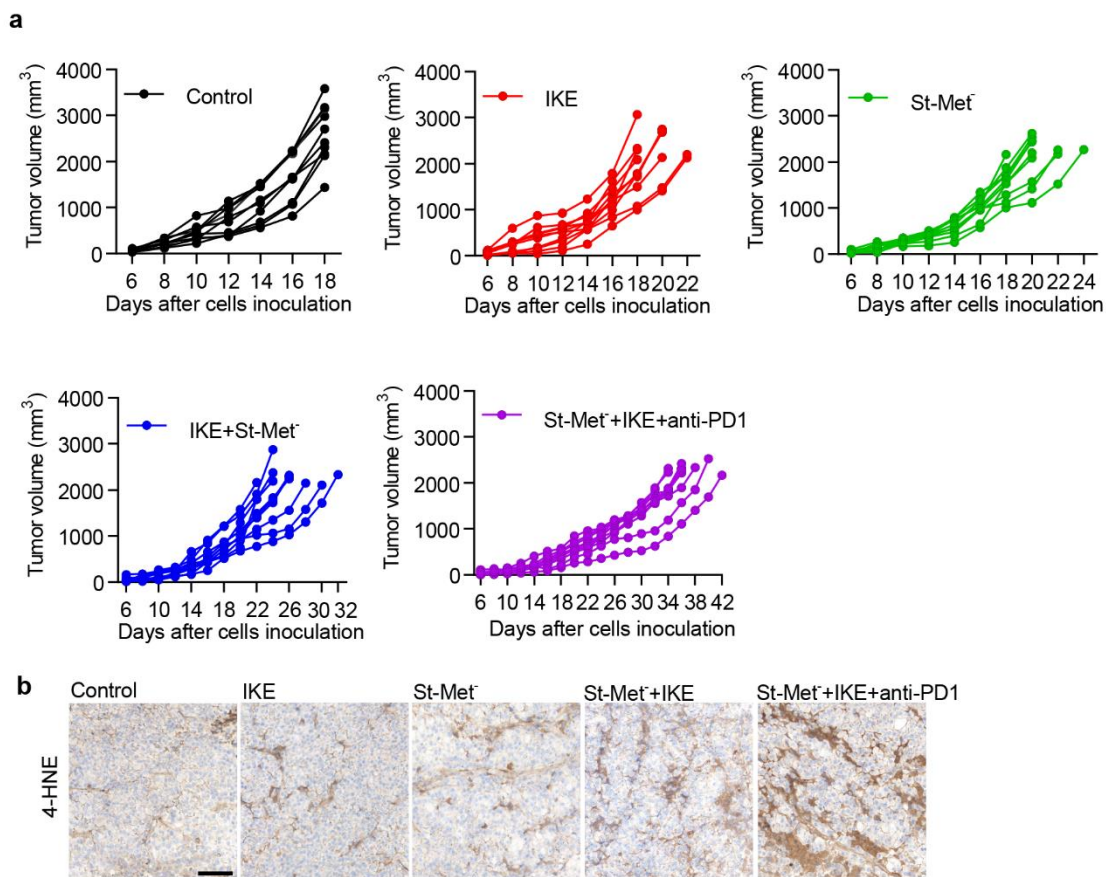

**Supplementary Figure 8. Triple combination has the most potent antitumor efficacy.**

**a**, B16F10 tumor-bearing mice were fed with Met<sup>+</sup> diet (control) and treated with IKE (20 mg/kg) (IKE), or fed with Met<sup>-</sup> diet intermittently (St-Met) and treated with IKE (20 mg/kg) (St-Met + IKE) or IKE plus anti-PD-1 antibody (100 µg/mouse) (St-Met + IKE + anti-PD1), n = 10 mice per group. Individual tumor growth from different groups was monitored over time. **b**, Images of immunohistochemistry for 4HNE in tumor tissue slides; scale bars, 100 µm.

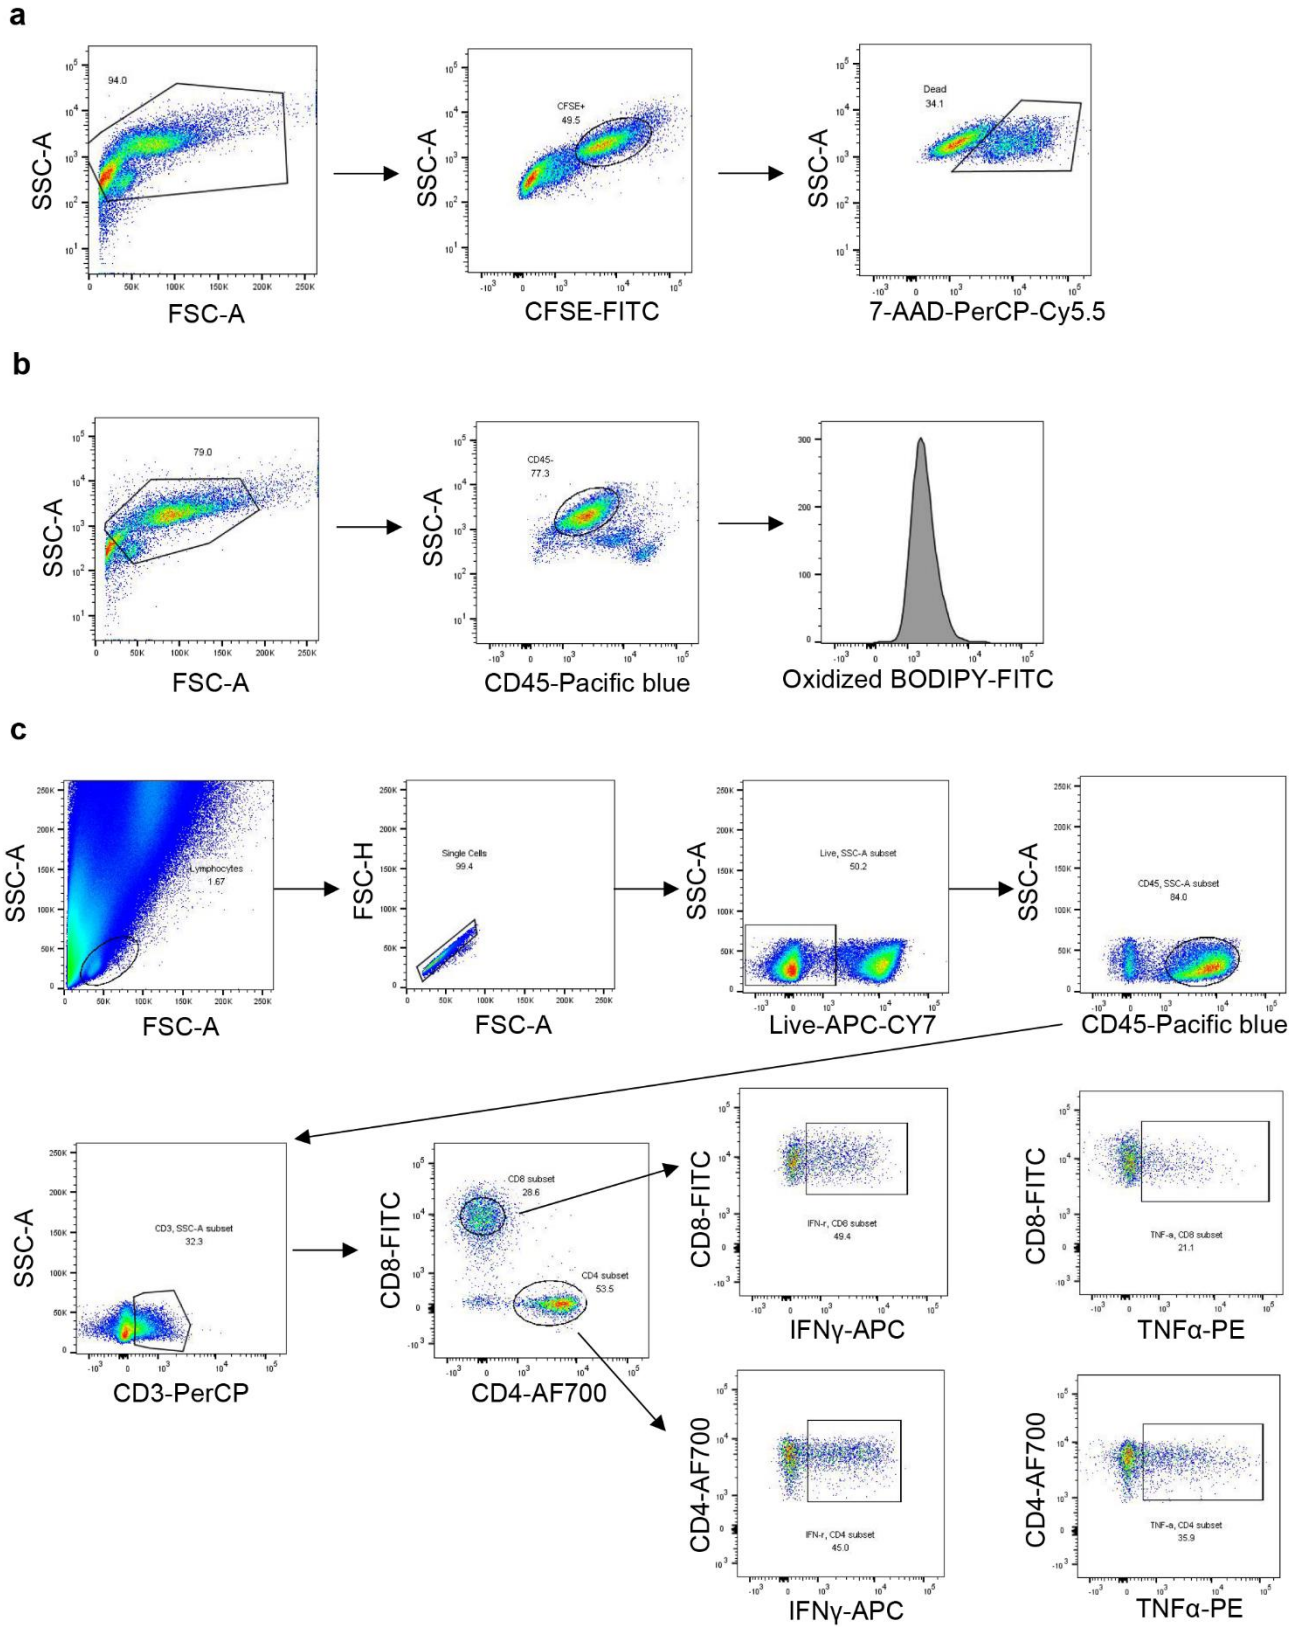

**Supplementary Figure 9. Flow cytometry gating strategies for analyzing cell death, lipid peroxidation and tumor-infiltrating lymphocytes.**

**a**, Flow cytometry gating strategy for cell death of CFSE<sup>+</sup> tumor cells in the co-culture system containing tumor cells and CD8<sup>+</sup> T cells, corresponding to the data shown in Figure 6b, e and Supplementary Figs. 6b, d.

**b**, Flow cytometry gating strategy for lipid peroxidation analysis in CD45<sup>-</sup> tumor cells from the co-culture of tumor and CD8<sup>+</sup> T cells, corresponding to the data shown in Figure 6c, f and Supplementary Fig. 6d (left).

**c**, Flow cytometry gating strategy for tumor-infiltrating lymphocytes isolated from subcutaneous B16F10 tumors, corresponding to the data shown in Figure 6n and 7b.



## Supplementary Tables

**Supplementary Table 1. Diet composition of methionine free diet**

| Diet type                        | Met <sup>-</sup> diet |        | Met <sup>+</sup> diet |        |
|----------------------------------|-----------------------|--------|-----------------------|--------|
|                                  | gm                    | kcal   | gm                    | kcal   |
| L-Methionine                     | 0                     | 0      | 3                     | 12     |
| L-Alanine                        | 3.5                   | 14     | 3.5                   | 14     |
| L-Arginine                       | 12.1                  | 48.4   | 12.1                  | 48.4   |
| L-Asparagine-H <sub>2</sub> O    | 6                     | 24     | 6                     | 24     |
| L-Aspartate                      | 3.5                   | 14     | 3.5                   | 14     |
| L-Cystine                        | 3.5                   | 14     | 3.5                   | 14     |
| L-Glutamine                      | 40                    | 160    | 40                    | 160    |
| Glycine                          | 23.3                  | 93.2   | 23.3                  | 93.2   |
| L-Histidine-HCl-H <sub>2</sub> O | 4.5                   | 18     | 4.5                   | 18     |
| L-Isoleucine                     | 8.2                   | 32.8   | 8.2                   | 32.8   |
| L-Leucine                        | 11.1                  | 44.4   | 11.1                  | 44.4   |
| L-Lysine-HCl                     | 18                    | 72     | 18                    | 72     |
| L-Phenylalanine                  | 7.5                   | 30     | 7.5                   | 30     |
| L-Proline                        | 3.5                   | 14     | 3.5                   | 14     |
| L-Serine                         | 3.5                   | 14     | 3.5                   | 14     |
| L-Threonine                      | 8.2                   | 32.8   | 8.2                   | 32.8   |
| L-Tryptophan                     | 1.8                   | 7.2    | 1.8                   | 7.2    |
| L-Tyrosine                       | 5                     | 20     | 5                     | 20     |
| L-Valine                         | 8.2                   | 32.8   | 8.2                   | 32.8   |
| Sucrose                          | 455.3                 | 1821.2 | 452.3                 | 1809.2 |
| Corn Starch                      | 150                   | 600    | 150                   | 600    |
| Maltodextrin 10                  | 50                    | 200    | 50                    | 200    |
| Cellulose                        | 30                    | 0      | 30                    | 0      |
| Corn Oil                         | 100                   | 900    | 100                   | 900    |
| Mineral Mix S10001               | 35                    | 0      | 35                    | 0      |
| Sodium Bicarbonate               | 7.5                   | 0      | 7.5                   | 0      |
| Vitamin Mix V10001               | 10                    | 40     | 10                    | 40     |
| Choline Bitrartrate              | 2                     | 0      | 2                     | 0      |
| Total                            | 1011                  | 4247   | 1011                  | 4247   |
